# Supplementary material for: Pseudocapacitive trimetallic NiCoMn-111 perovskite fluorides for advanced Li-ion supercabatteries
Source: Royal Society of Chemistry journal article supplement (doi:10.1039/d1na00329a), 2021-01-01
Supplement: d1na00329a1.pdf [file d1na00329a1.pdf]

## Supporting Information

### **Pseudocapacitive trimetallic NiCoMn-111 perovskite fluorides for advanced Li-ion supercabineries**

Tong Yan<sup>1</sup>, Yongfa Huang<sup>1</sup>, Rui Ding<sup>\*</sup>, Wei Shi, Danfeng Ying, Ziyang Jia, Caini Tan, Yuxi Huang, Xiujuan Sun, and Enhui Liu

Key Laboratory of Environmentally Friendly Chemistry and Applications of Ministry of Education, College of Chemistry, Xiangtan University, Hunan 411105, P.R. China

#### **\*Corresponding Author**

Emails: drm8122@163.com; drm8122@xtu.edu.cn (Rui Ding)

<sup>1</sup>The authors contribute equally to the work.

## Table of Contents

**Fig. S1** The XRD pattern of 8<sup>#</sup> sample.

**Fig. S2** The crystalline structures of perovskite KMF<sub>3</sub> and crystalline parameters for KNiF<sub>3</sub>, KCoF<sub>3</sub> and KMnF<sub>3</sub>.

**Fig. S3** SEM and TEM images of the 8<sup>#</sup> sample.

**Fig. S4** Performance of Li half-cell: CV plots for the first three cycles of 1<sup>#</sup>-9<sup>#</sup> electrodes at 0.3 mV s<sup>-1</sup> (a-i).

**Fig. S5** Performance of Li half-cell: GCD curves for the first five cycles of 1<sup>#</sup>-9<sup>#</sup> electrodes at 0.1 A g<sup>-1</sup> (a-i).

**Fig. S6** Performance of Li half-cell: GCD curves for the respective 5<sup>th</sup> cycles at 0.1~3.2 A g<sup>-1</sup> of 1<sup>#</sup>-9<sup>#</sup> electrodes(a-i).

**Fig. S7** Performance of Li half-cell: Rate performance and coulombic efficiency of 1<sup>#</sup>-9<sup>#</sup> electrodes(a-i).

**Fig. S8** Performance of Li half-cell: Cycling stability and coulombic efficiency of 1<sup>#</sup>-9<sup>#</sup> electrodes at 1 A g<sup>-1</sup> for 1000 cycles(a-i).

**Fig. S9** GITT curves and the corresponding Li<sup>+</sup> diffusion coefficients of 8<sup>#</sup> electrode.

**Fig. S10** The 1st segment (a), and 2nd segment (b) GCD curves at 0.1 A g<sup>-1</sup> of 8<sup>#</sup> electrode.

**Fig. S11** The CV plots at 10 mV s<sup>-1</sup> (a), GCD curves at 1 A g<sup>-1</sup> (b), Ragone plots (c) and cycling behavior for 10000 cycles at 1 A g<sup>-1</sup> (d) of 1<sup>#</sup>, 2<sup>#</sup>, 4<sup>#</sup>, 7<sup>#</sup>, 8<sup>#</sup>//AC LICs

**Fig. S12** GCD curves at 0.5-8 A g<sup>-1</sup> of 1<sup>#</sup>, 2<sup>#</sup>, 4<sup>#</sup>, 7<sup>#</sup> and 8<sup>#</sup>//AC LICs.

**Fig. S13** The typical precharged GCD curves of 8<sup>#</sup> anode with different precharged current densities

**Fig. S14** The GCD curves at 1 A g<sup>-1</sup> (a), Ragone plots (b), and cycling behavior for 5000 cycles at 5 A g<sup>-1</sup> in the potential of 0-4.8 V(c) of 8<sup>#</sup>-P//AC LICs with the anode precharged at 0.1-2 A g<sup>-1</sup>.

**Fig. S15** The GCD curves at 1-16 A g<sup>-1</sup> of 8<sup>#</sup>-P//AC LICs in the potential of 0-4.8 V with different precharging current densities.

**Fig. S16** The CV plots at 10-160 mV s<sup>-1</sup> and GCD curves at 0.5-16 A g<sup>-1</sup> of 8<sup>#</sup>-P//AC

LICs: 4.0 V (a, e), 4.3 V (b, f), 4.5 V (c, g) and 4.7 V (d, h).

**Fig. S17** Performance of AC, AC+LMO and AC+LFP cathode: CV plots at 0.5-80  $\text{mV s}^{-1}$  (a, d, g), GCD curves at  $1 \text{ A g}^{-1}$  (b, e, h) and GCD curves at 0.1-3.2  $\text{A g}^{-1}$  (c, f, i).

**Fig. S18** The CV plots at 10-160  $\text{mV s}^{-1}$  and GCD curves at 0.5-16  $\text{A g}^{-1}$  of 8<sup>#</sup>-P//AC+LFP(1:1) LIC/LIB hybrids: 4.0 V (a, e), 4.3 V (b, f), 4.5 V (c, g) and 4.7 V (d, h).

**Table S1** Chemicals, reagents and materials used in the study.

**Table S2** The synthesis conditions of nine KNCMF-111 samples.

**Table S3** Specific capacity ( $\text{mAh g}^{-1}$ ) and cycling behavior of 1<sup>#</sup>-9<sup>#</sup>, AC, AC+LMO (1:1) and AC+LFP (1:1) electrodes in non-aqueous system

**Table S4** The design of electrode mass ratios of LICs and LICBs

**Table S5** Specific capacity and cycling retention of KNCMF-111(8<sup>#</sup>-P)//AC LICs under different working voltages

**Table S6** Specific capacity and cycling retention of KNCMF-111(8<sup>#</sup>-P)//AC+LFP LICBs under different working voltages

**Table S7** A comparison for the performance of the KNCMF-111(8<sup>#</sup>-P)//AC+LFP LICBs in the study with some reported LICs.

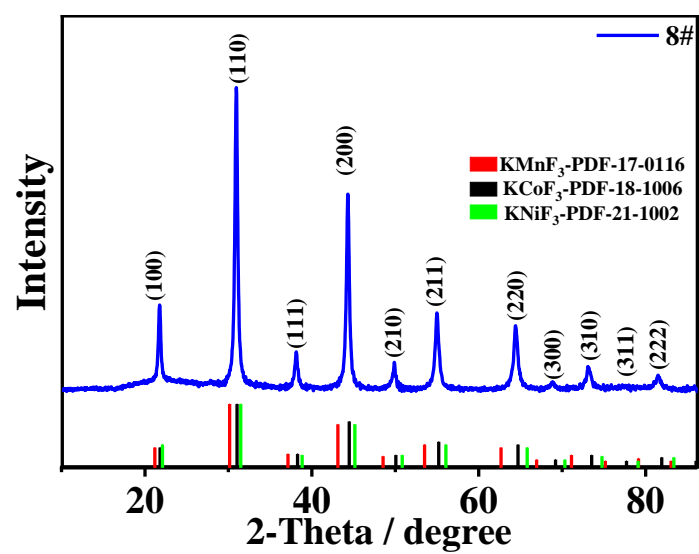

**Fig. S1** The XRD pattern of 8<sup>#</sup> sample.

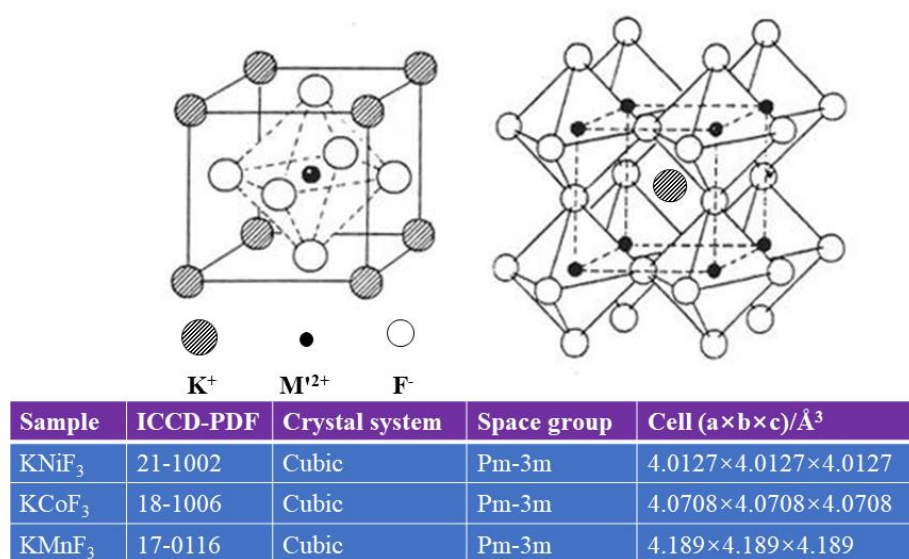

**Fig. S2** The crystalline structures of perovskite  $KM'F_3$  and crystalline parameters for  $KNiF_3$ ,  $KCoF_3$  and  $KMnF_3$ .

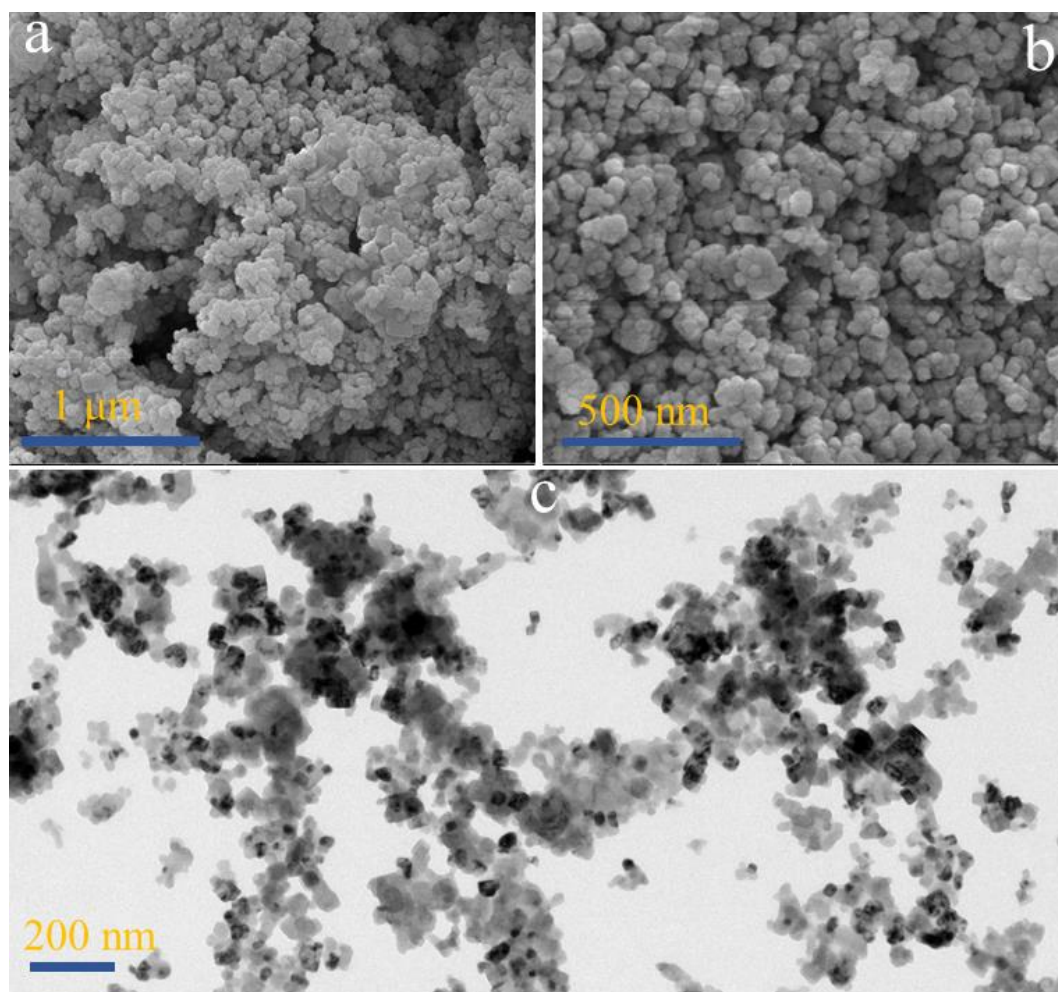

**Fig. S3** SEM and TEM images of the 8<sup>#</sup> sample.

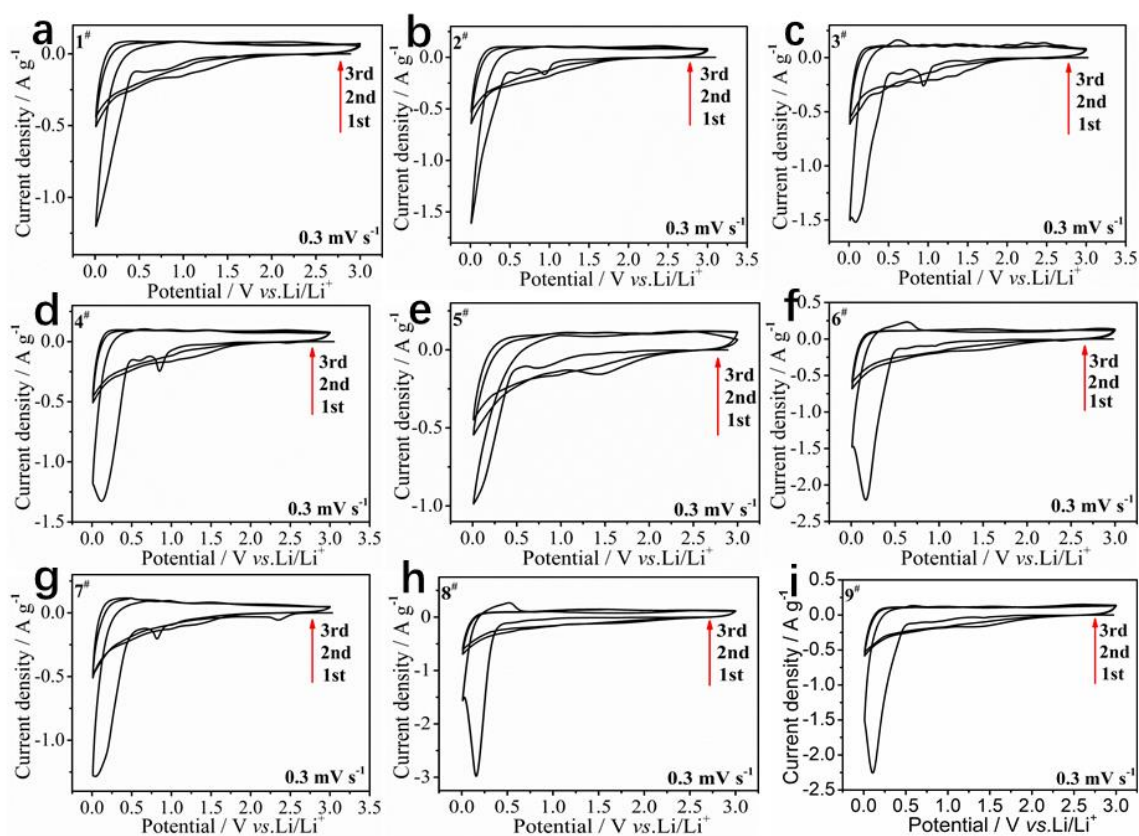

**Fig. S4** Performance of Li half-cell: CV plots for the first three cycles of 1<sup>#</sup>-9<sup>#</sup> electrodes at 0.3 mV s<sup>-1</sup> (a-i).

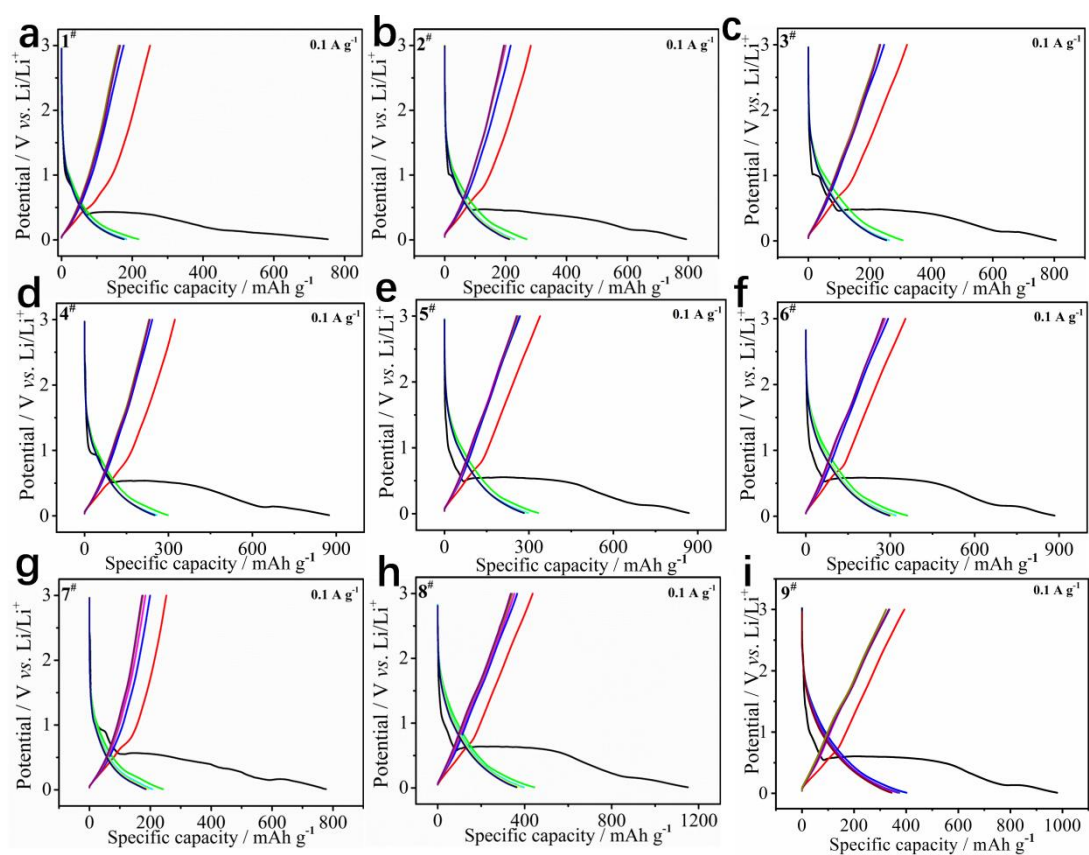

**Fig. S5** Performance of Li half-cell: GCD curves for the first five cycles of 1<sup>#</sup>-9<sup>#</sup> electrodes at 0.1 A g<sup>-1</sup> (a-i).



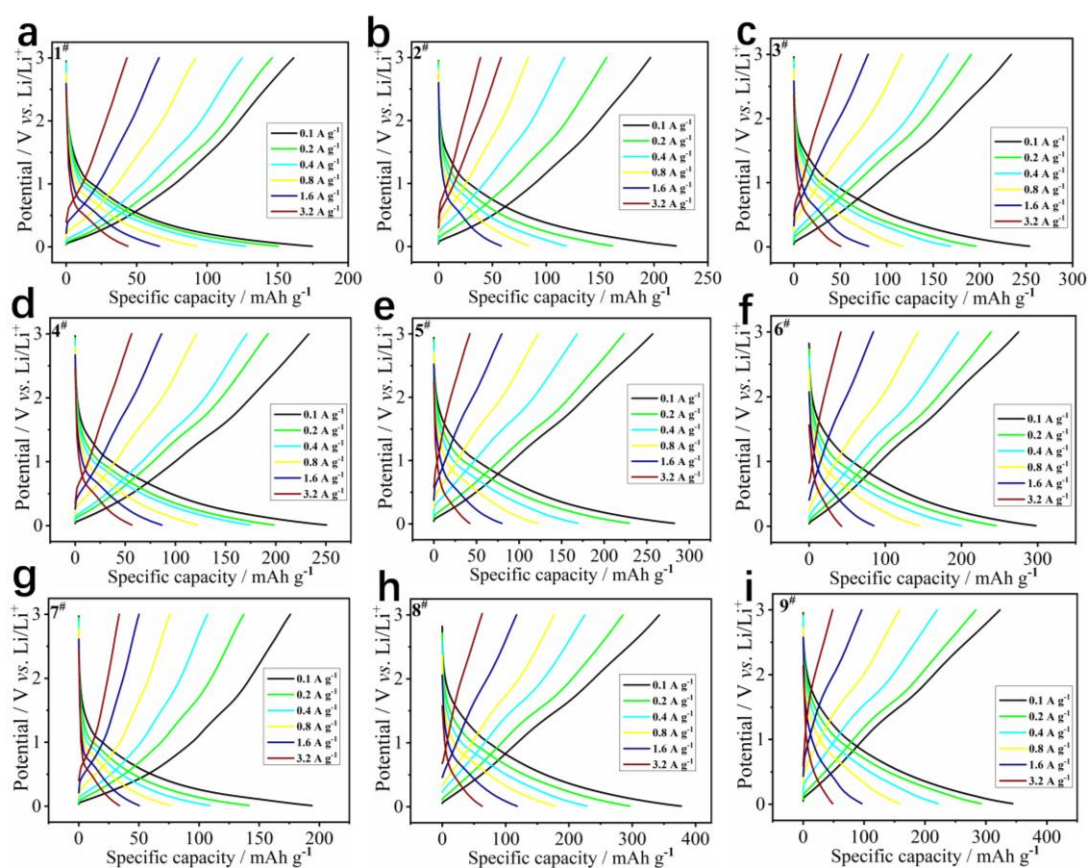

**Fig. S6** Performance of Li half-cell: GCD curves for the respective 5<sup>th</sup> cycles at 0.1~3.2 A g<sup>-1</sup> of 1<sup>#</sup>-9<sup>#</sup> electrodes(a-i).

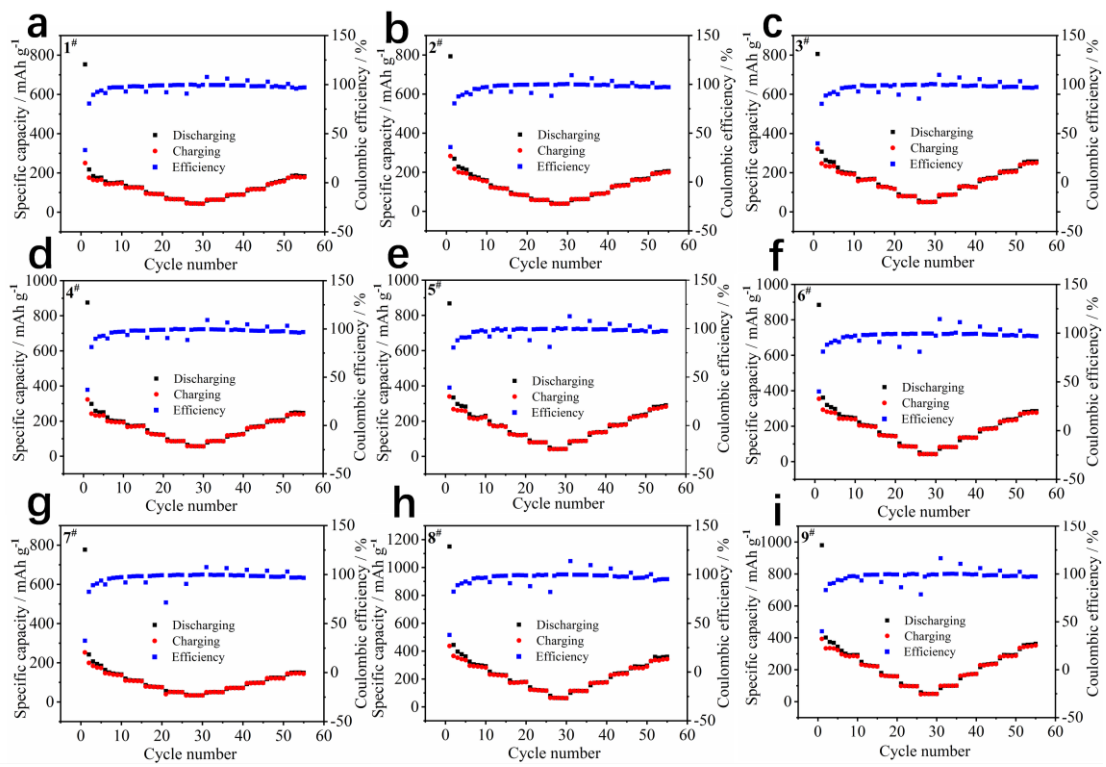

**Fig. S7** Performance of Li half-cell: Rate performance and coulombic efficiency of 1<sup>#</sup>-9<sup>#</sup> electrodes(a-i).

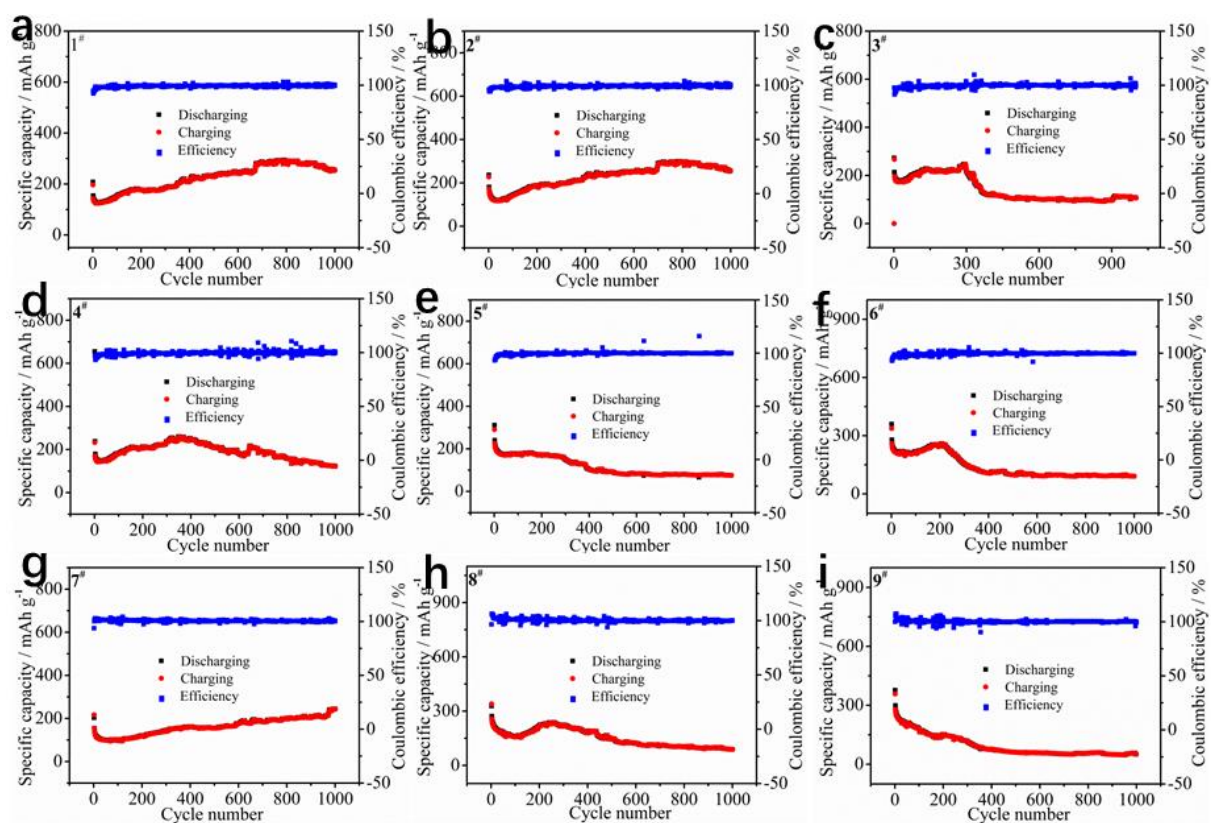

**Fig. S8** Performance of Li half-cell: Cycling stability and coulombic efficiency of 1<sup>#</sup>-9<sup>#</sup> electrodes at 1 A g<sup>-1</sup> for 1000 cycles(a-i).

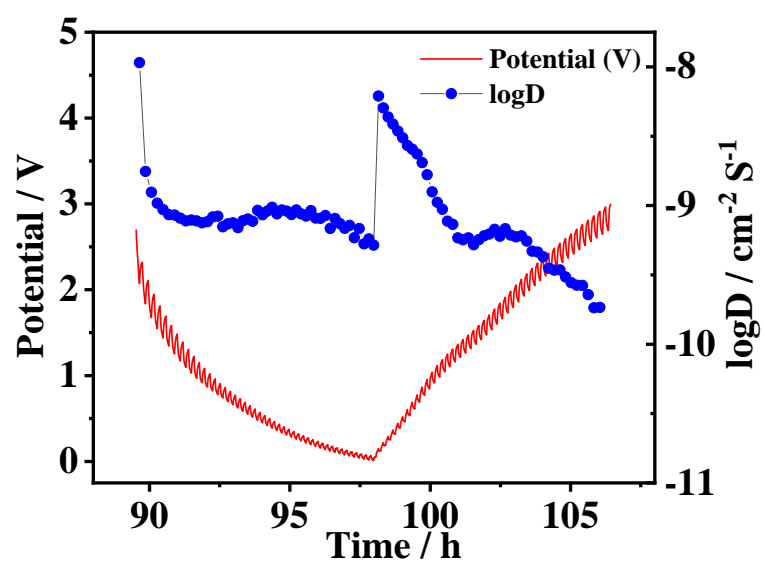

**Fig. S9** GITT curves and the corresponding  $\text{Li}^+$  diffusion coefficients of 8<sup>#</sup> electrode (Note: Based on the fifth GITT cycle at  $0.1 \text{ A g}^{-1}$ , and  $\tau$  is 300s).

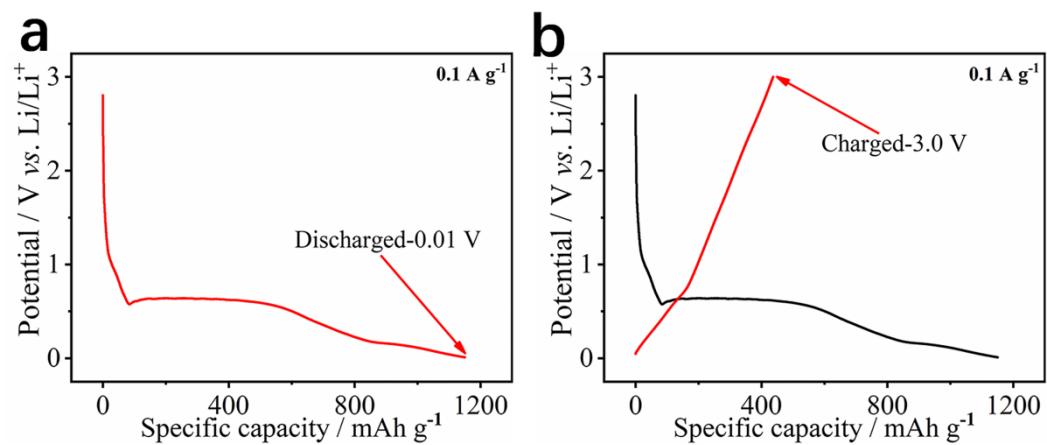

**Fig. S10** The 1st segment (a), and 2nd segment (b) GCD curves at 0.1 A g<sup>-1</sup> of 8# electrode.

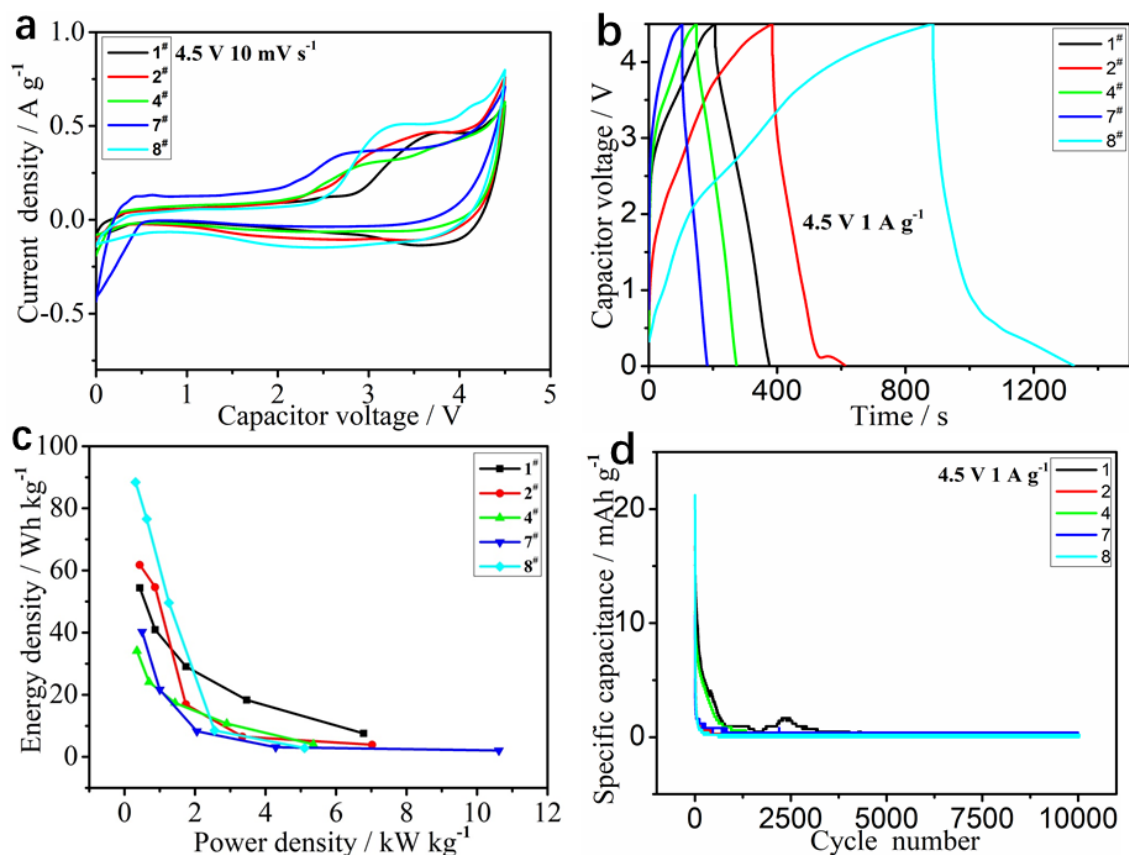

**Fig. S11** The CV plots at 10 mV s<sup>-1</sup> (a), GCD curves at 1 A g<sup>-1</sup> (b), Ragone plots (c) and cycling behavior for 10000 cycles at 1 A g<sup>-1</sup> (d) of 1<sup>#</sup>, 2<sup>#</sup>, 4<sup>#</sup>, 7<sup>#</sup>, 8<sup>#</sup>//AC LICs

Since the KNCMF-111 (1<sup>#</sup>, 2<sup>#</sup>, 4<sup>#</sup>, 7<sup>#</sup> and 8<sup>#</sup>) electrode materials demonstrate overall superior performance in half-cells, we further constructed LICs using these materials as anode and AC as cathode. Fig. S26 illustrated the electrochemical performance of these LICs under the working voltages of 4.5 V (the GCD curves and  $m_+/m_-$  ratios of the LICs can be seen in the Fig. S27, Table S7). Based on the results, one can see that the 8<sup>#</sup>//AC LIC exhibits the relatively superior performance among all candidates, but still suffering from an unsatisfactory energy/power densities and very low cycling stability due to lack of precharging (or prelithiated) treatment.

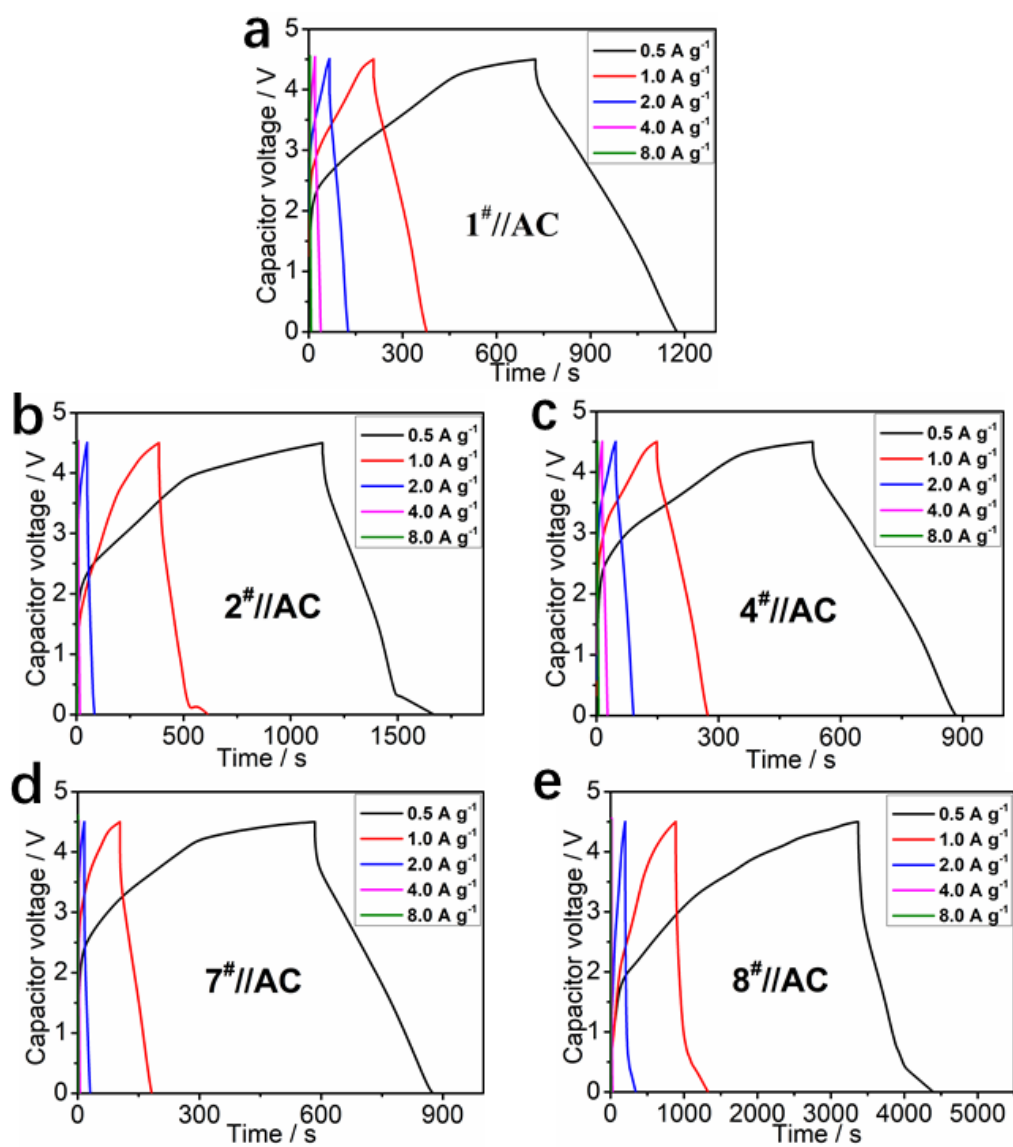

**Fig. S12** GCD curves at 0.5-8 A g<sup>-1</sup> of 1<sup>#</sup>, 2<sup>#</sup>, 4<sup>#</sup>, 7<sup>#</sup> and 8<sup>#</sup>//AC LICs.

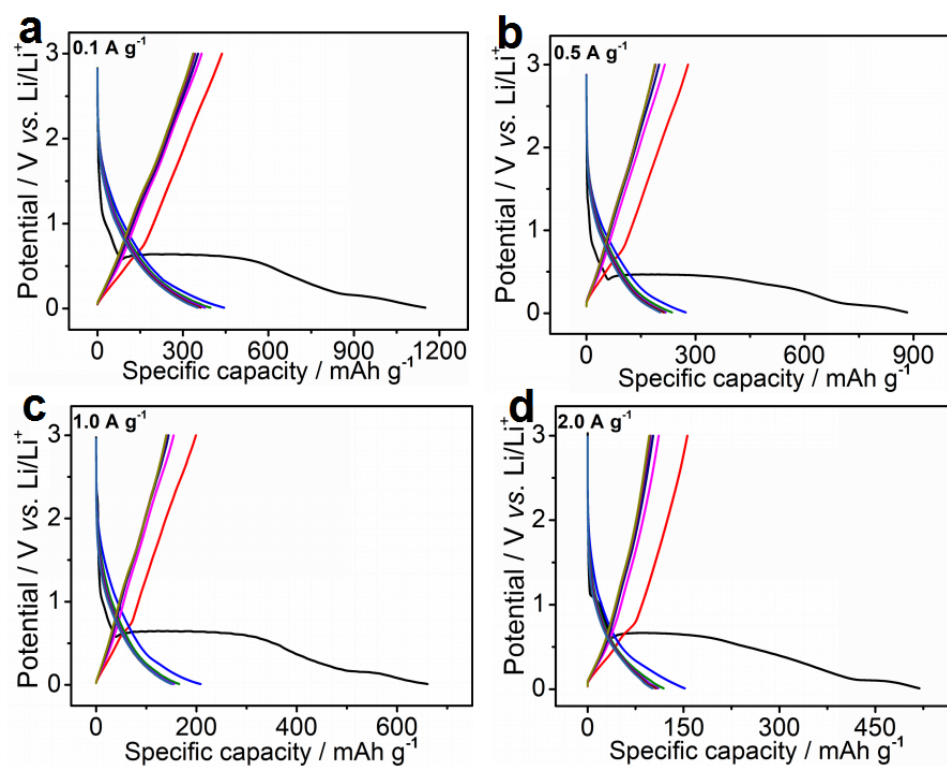

**Fig. S13** The typical precharged GCD curves of 8# anode with different precharged current densities



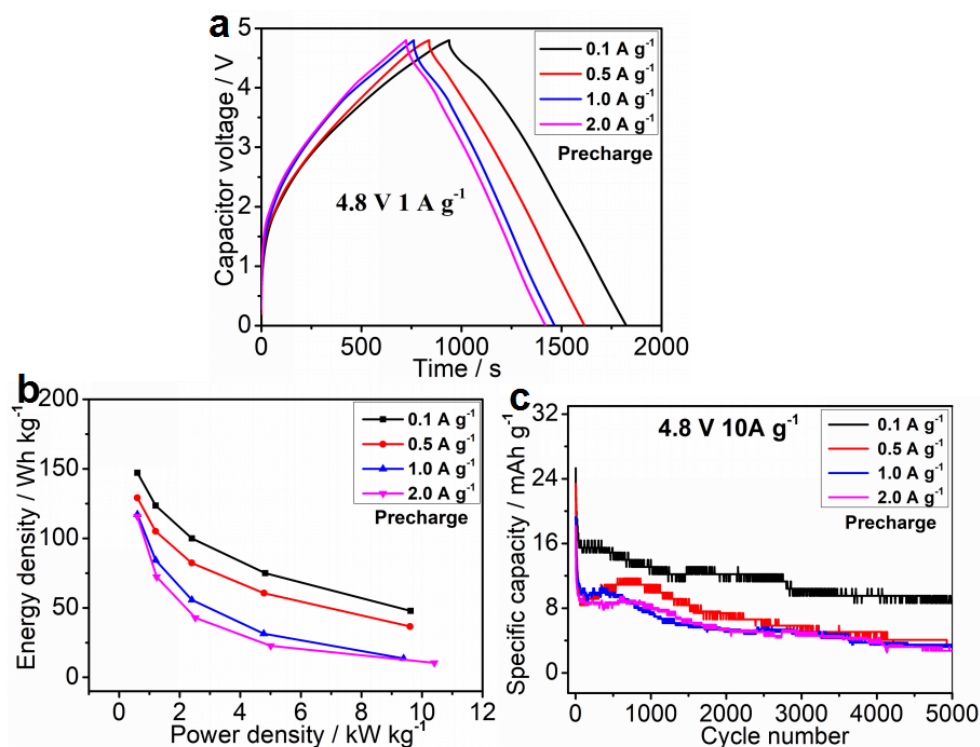

**Fig. S14** The GCD curves at 1  $\text{A g}^{-1}$  (a), Ragone plots (b), and cycling behavior for 5000 cycles at 5  $\text{A g}^{-1}$  in the potential of 0-4.8 V(c) of  $8^{\#}$ -P//AC LICs with the anode precharged at 0.1-2  $\text{A g}^{-1}$ .

In order to optimize the percharging (prelithiation) model, three LICs were fabricated with  $8^{\#}$  electrode precharged under 0.1, 0.5, 1 and 2  $\text{A g}^{-1}$  in Fig. S28. Based on the performance shown in the Fig. S29, 30, one can see that the precharging current density of 0.1  $\text{A g}^{-1}$  is acted as the best precharging model.

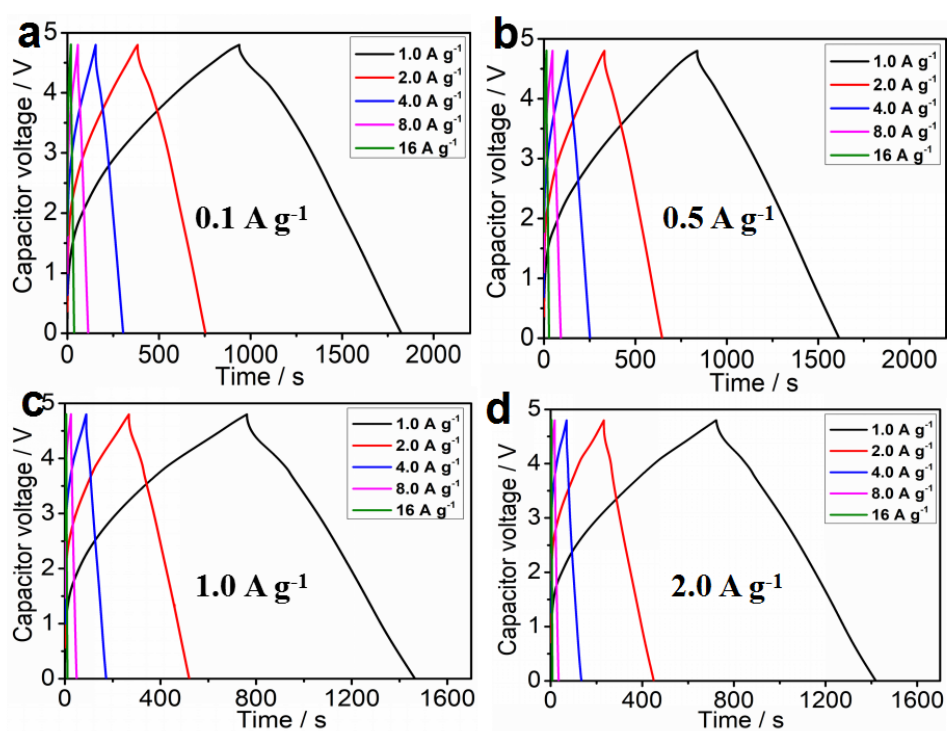

**Fig. S15** The GCD curves at 1-16  $\text{A g}^{-1}$  of  $8^{\#}\text{-P//AC}$  LICs in the potential of 0-4.8 V with different precharging current densities.

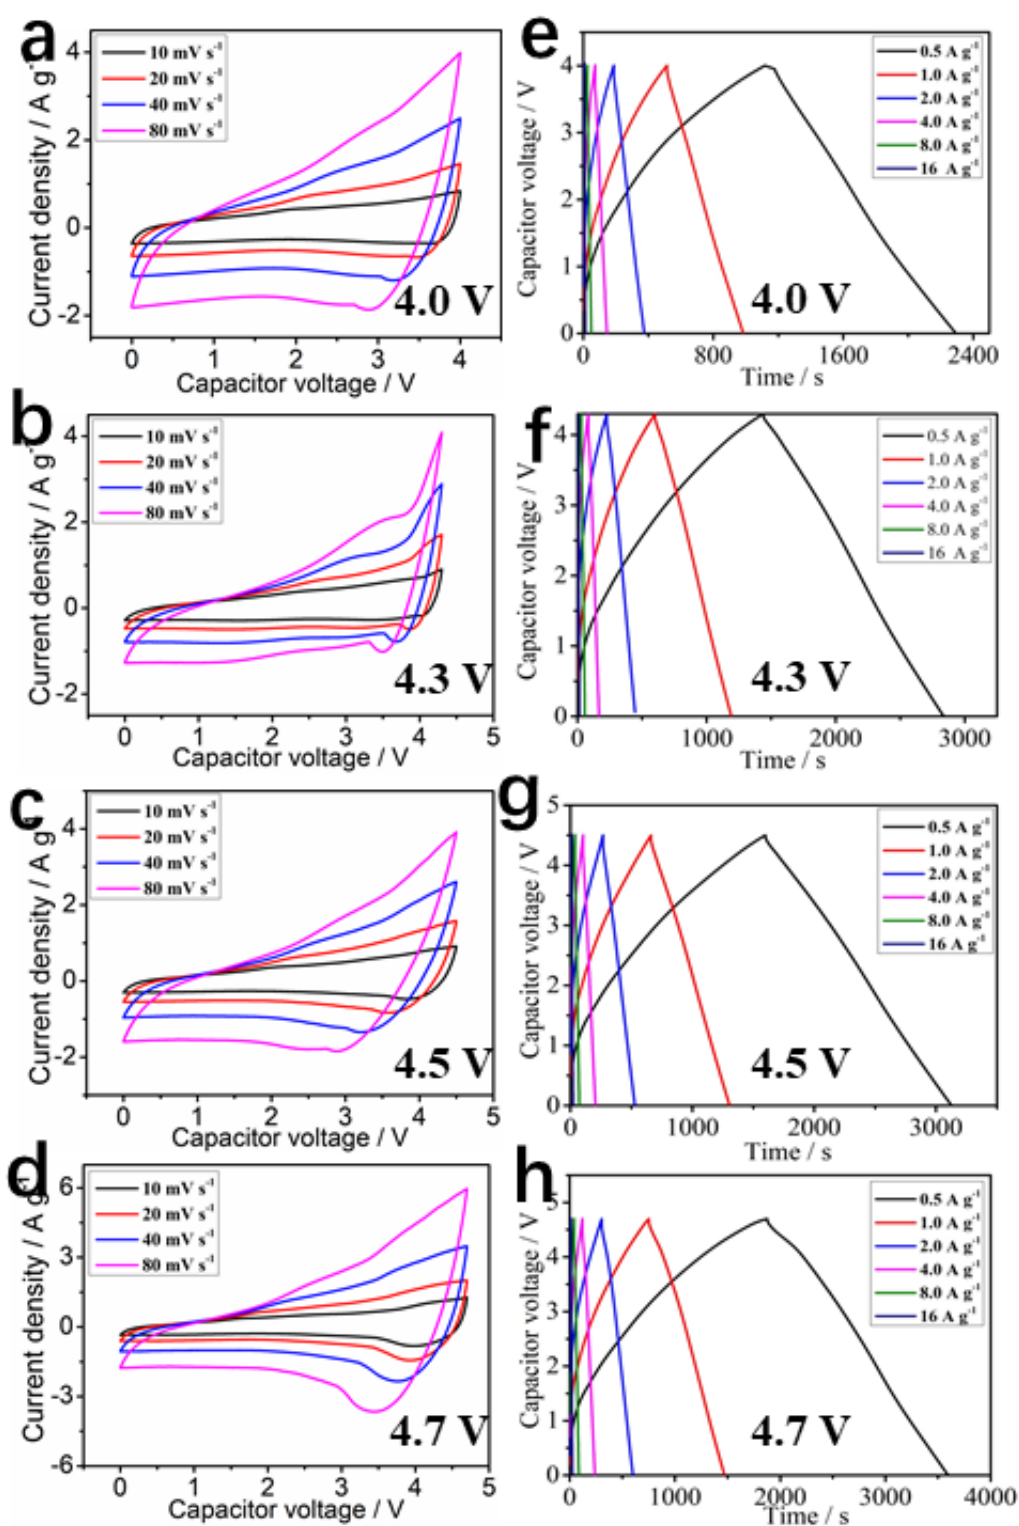

**Fig. S16** The CV plots at 10-160 mV s<sup>-1</sup> and GCD curves at 0.5-16 A g<sup>-1</sup> of 8<sup>#</sup>-P//AC LICs: 4.0 V (a, e), 4.3 V (b, f), 4.5 V (c, g) and 4.7 V (d, h).

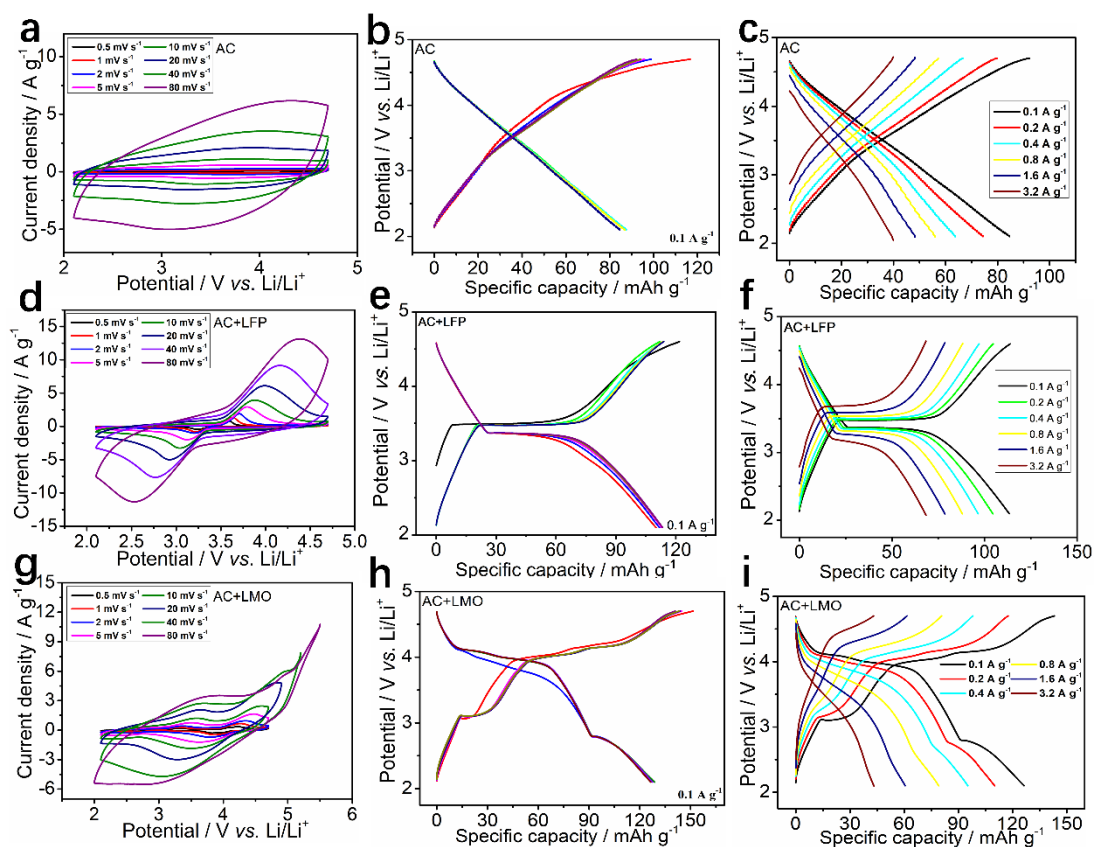

**Fig. S17** Performance of AC, AC+LMO and AC+LFP cathode: CV plots at 0.5-80  $\text{mV s}^{-1}$  (a, d, g), GCD curves at 1  $\text{A g}^{-1}$  (b, e, h) and GCD curves at 0.1-3.2  $\text{A g}^{-1}$  (c, f, i).

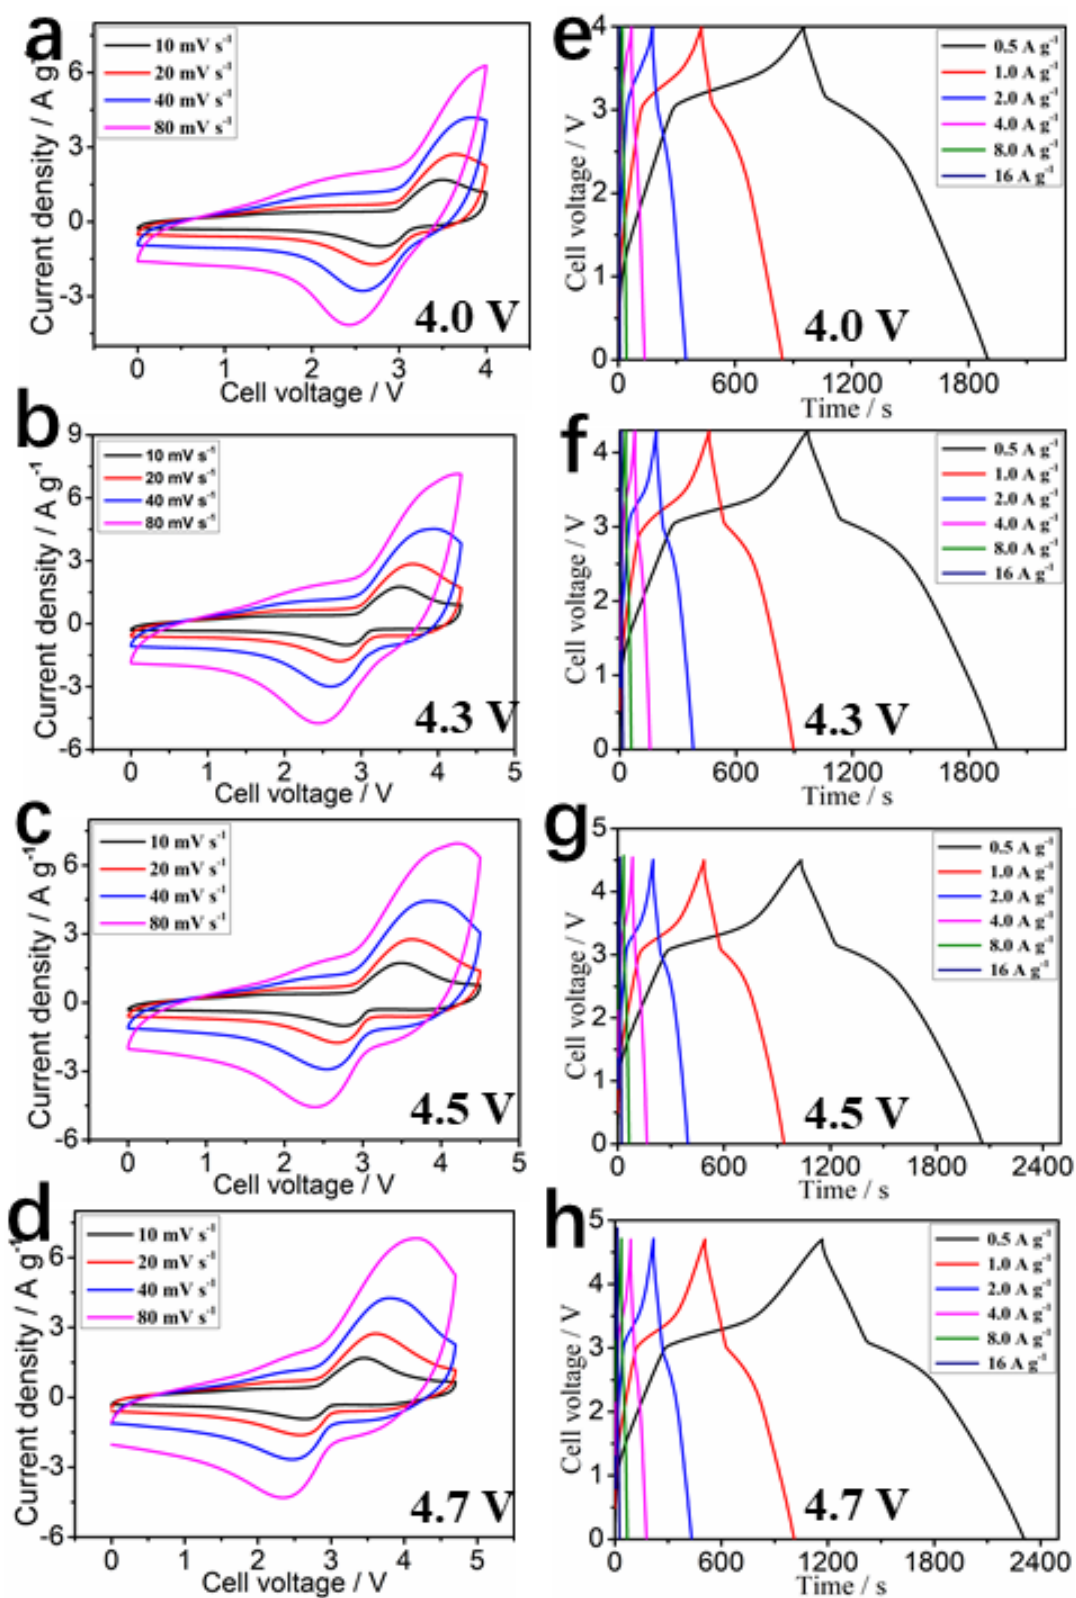

**Fig. S18** The CV plots at 10-160  $\text{mV s}^{-1}$  and GCD curves at 0.5-16  $\text{A g}^{-1}$  of 8#-P//AC+LFP(1:1) LICBs: 0-4.0 V (a, e), 0-4.3 V (b, f), 0-4.5 V (c, g) and 0-4.7 V (d, h).

**Table S1** Chemicals, reagents and materials used in the study.

| Chemicals, agents and materials         | Type                  | Company             | Characteristics                                                                                |
|-----------------------------------------|-----------------------|---------------------|------------------------------------------------------------------------------------------------|
| <b>NiCl<sub>2</sub>•6H<sub>2</sub>O</b> | AR                    | SinoPharm           | purity≥98.0%                                                                                   |
| <b>CoCl<sub>2</sub>•6H<sub>2</sub>O</b> | AR                    | SinoPharm           | purity≥99.0%                                                                                   |
| <b>MnCl<sub>2</sub>•4H<sub>2</sub>O</b> | AR                    | SinoPharm           | purity≥99.0%                                                                                   |
| <b>KF•2H<sub>2</sub>O</b>               | AR                    | SinoPharm           | purity≥99.0%                                                                                   |
| <b>PVP-K30</b>                          | GR                    | SinoPharm           | /                                                                                              |
| <b>EG</b>                               | AR                    | SinoPharm           | purity≥99.0%                                                                                   |
| <b>NBA</b>                              | AR                    | SinoPharm           | purity≥99.0%                                                                                   |
| <b>NPA</b>                              | AR                    | SinoPharm           | purity≥99.0%                                                                                   |
| <b>LiFePO<sub>4</sub></b>               | LFP-NCO               | Aleees              | D50: 4 ± 2 μm; Tap: 1 ± 0.2 g cm <sup>-3</sup> ; SSA: 13 ± 2 m <sup>2</sup> g <sup>-1</sup>    |
| <b>LiMn<sub>2</sub>O<sub>4</sub></b>    | Battery grade         | MTI                 | D59: 14-22 μm; Tap: 1.8-2.5 g cm <sup>-3</sup> ; ; SSA: 0.5-1.2 m <sup>2</sup> g <sup>-1</sup> |
| <b>AC</b>                               | YEC 8b                | FuZhou YiHuan       | D50: ~10 μm; Density: >0.4 g cm <sup>-3</sup> ; SSA: 2000~2500 m <sup>2</sup> g <sup>-1</sup>  |
| <b>AB</b>                               | Battery grade         | /                   | /                                                                                              |
| <b>NMP</b>                              | AR                    | Kermel              | purity≥99.0%                                                                                   |
| <b>PVDF</b>                             | Battery grade         | /                   | /                                                                                              |
| <b>Electrolytes</b>                     | LBC-305-01            | CAPCHEM             | 1 M LiPF <sub>6</sub> /EC:EMC:DMC (1:1:1) /1% VC                                               |
| <b>Li plate</b>                         | 15.6*0.45 mm          | China Energy        | 15.6*0.45 mm                                                                                   |
| <b>Cu foil</b>                          | 200*0.015             | GuangZhou JiaYuan   | Total thickness: 15 μm; weight: 87 g m <sup>-2</sup>                                           |
| <b>Carbon coated-Al foil</b>            | 222*0.015             | GuagZhou NaNuo      | Total thickness: 17 μm; Strength: 192 Mpa                                                      |
| <b>Glass microfiber filters</b>         | GF/D 2.7 μm; 1823-025 | Whatman             | Diameter: 25 mm; Thickness: 675 μm; weight: 121 g m <sup>-2</sup>                              |
| <b>Cell components</b>                  | CR-2032               | ShenZhen TianChenHe | /                                                                                              |

**Table S2** The synthesis conditions of nine KNCMF-111 samples.

| Samples        | $n(\text{total metal salt})/n(\text{KF})$ | Experimental conditions |             |      |
|----------------|-------------------------------------------|-------------------------|-------------|------|
|                |                                           | Solvent                 | Temperature | Time |
| 1 <sup>#</sup> | 1:2                                       | EG                      | 160 °C      | 6 h  |
| 2 <sup>#</sup> | 1:2                                       | EG+NBA (1:1)            | 170 °C      | 12 h |
| 3 <sup>#</sup> | 1:2                                       | EG+NPA (1:1).           | 180 °C      | 24 h |
| 4 <sup>#</sup> | 1:2.5                                     | EG                      | 170 °C      | 24 h |
| 5 <sup>#</sup> | 1:2.5                                     | EG+NBA (1:1)            | 180 °C      | 6 h  |
| 6 <sup>#</sup> | 1:2.5                                     | EG+NPA (1:1).           | 160 °C      | 12 h |
| 7 <sup>#</sup> | 1:3                                       | EG                      | 180 °C      | 12 h |
| 8 <sup>#</sup> | 1:3                                       | EG+NBA (1:1)            | 160 °C      | 24 h |
| 9 <sup>#</sup> | 1:3                                       | EG+NPA (1:1)            | 170 °C      | 6 h  |

Note: EG ethylene glycol; NBA n-butyl alcohol; NPA n-propyl alcohol.

**Table S3** Specific capacity (mAh g<sup>-1</sup>) and cycling behavior of 1<sup>#</sup>-9<sup>#</sup>, AC, AC+LMO (1:1) and AC+LFP (1:1) electrodes in non-aqueous system.

| Samples        | Current density/ (A g <sup>-1</sup> ) |        |        |        |        |       | Cycling Retention%/              |
|----------------|---------------------------------------|--------|--------|--------|--------|-------|----------------------------------|
|                | 0.1                                   | 0.2    | 0.4    | 0.8    | 1.6    | 3.2   | 1 A g <sup>-1</sup> /1000 cycles |
| 1 <sup>#</sup> | 161.37                                | 146.09 | 124.93 | 92.00  | 65.92  | 43.18 | 196                              |
| 2 <sup>#</sup> | 196.71                                | 156.15 | 116.89 | 83.48  | 58.09  | 39.01 | 190                              |
| 3 <sup>#</sup> | 233.99                                | 191.08 | 166.11 | 116.70 | 79.92  | 50.86 | 58                               |
| 4 <sup>#</sup> | 232.96                                | 192.38 | 171.26 | 121.37 | 86.18  | 56.62 | 80                               |
| 5 <sup>#</sup> | 256.82                                | 223.01 | 168.27 | 122.20 | 79.69  | 42.24 | 39                               |
| 6 <sup>#</sup> | 274.86                                | 238.94 | 196.17 | 143.27 | 84.36  | 41.76 | 39                               |
| 7 <sup>#</sup> | 173.41                                | 136.63 | 106.00 | 75.07  | 49.98  | 33.68 | 208                              |
| 8 <sup>#</sup> | 342.81                                | 285.50 | 225.11 | 176.89 | 117.33 | 63.13 | 40                               |
| 9 <sup>#</sup> | 323.08                                | 283.38 | 220.07 | 157.97 | 96.26  | 48.42 | 20                               |
| AC             | 84.52                                 | 74.40  | 63.69  | 55.95  | 48.21  | 39.88 | 72                               |
| AC+LMO         | 126.43                                | 110.11 | 95.28  | 79.14  | 60.56  | 43.27 | 36                               |
| AC+LFP         | 113.42                                | 104.56 | 96.56  | 88.05  | 78.64  | 68.43 | 87                               |



**Table S4** The design of electrode mass ratios of LICs and LICBs.

| LICs/<br>LICBs            | $Q_{m-}(\text{mAh g}^{-1})/Q_{m+}(\text{mAh g}^{-1})$ at 0.1-3.2 A g <sup>-1</sup> |     |     |     |     |     | $m_{+}/m_{-}$ |
|---------------------------|------------------------------------------------------------------------------------|-----|-----|-----|-----|-----|---------------|
|                           | 0.1                                                                                | 0.2 | 0.4 | 0.8 | 1.6 | 3.2 |               |
| 1 <sup>#</sup> //AC       | 1.9                                                                                | 2.0 | 2.0 | 1.6 | 1.4 | 1.1 | <b>1.7</b>    |
| 2 <sup>#</sup> //AC       | 2.3                                                                                | 2.1 | 1.8 | 1.5 | 1.2 | 1.0 | <b>1.7</b>    |
| 4 <sup>#</sup> //AC       | 2.8                                                                                | 2.6 | 2.7 | 2.2 | 1.8 | 1.4 | <b>2.3</b>    |
| 7 <sup>#</sup> //AC       | 2.1                                                                                | 1.8 | 1.7 | 1.3 | 1.0 | 0.8 | <b>1.5</b>    |
| 8 <sup>#</sup> //AC       | 4.1                                                                                | 3.8 | 3.5 | 3.2 | 2.4 | 1.6 | <b>3.1</b>    |
| 8 <sup>#</sup> -P//AC     | 4.1                                                                                | 3.8 | 3.5 | 3.2 | 2.4 | 1.6 | <b>3.1</b>    |
| 8 <sup>#</sup> -P//AC+LFP | 3.0                                                                                | 2.7 | 2.3 | 2.0 | 1.5 | 0.9 | <b>1.5*</b>   |

**\*Note:** The  $m_{+}/m_{-}$  value was designed considering the excess of anode in the LICBs.

**Table S5** Specific capacity and cycling retention of KNCMF-111(8<sup>#</sup>-P)//AC LICs under different working voltages

| <b>Voltages</b> | <b>Energy density<br/>/ Wh kg<sup>-1</sup></b> | <b>Power density<br/>/ kW kg<sup>-1</sup></b> | <b>Cycling retention<br/>%</b>                                                                                                    |
|-----------------|------------------------------------------------|-----------------------------------------------|-----------------------------------------------------------------------------------------------------------------------------------|
| 0-4.0 V         | 79.54-15.18                                    | 0.24-7.81                                     | 100%/1000/10 A g <sup>-1</sup><br>95%/2000/10 A g <sup>-1</sup><br>90%/3000/10 A g <sup>-1</sup><br>90%/4000/10 A g <sup>-1</sup> |
| 0-4.3 V         | 101.60-18.64                                   | 0.26-8.39                                     | 100%/1000/10 A g <sup>-1</sup><br>95%/2000/10 A g <sup>-1</sup><br>95%/3000/10 A g <sup>-1</sup><br>82%/4000/10 A g <sup>-1</sup> |
| 0-4.5 V         | 116.16-25.85                                   | 0.27-8.78                                     | 92%/1000/10 A g <sup>-1</sup><br>77%/2000/10 A g <sup>-1</sup><br>74%/3000/10 A g <sup>-1</sup><br>70%/4000/10 A g <sup>-1</sup>  |
| 0-4.7 V         | 136.50-32.10                                   | 0.29-9.17                                     | 69%/1000/10 A g <sup>-1</sup><br>66%/2000/10 A g <sup>-1</sup><br>60%/3000/10 A g <sup>-1</sup><br>47%/4000/10 A g <sup>-1</sup>  |

**Table S6** Specific capacity and cycling retention of KNCMF-111(8<sup>#</sup>-P)//AC+LFP LICBs under different working voltages

| <b>Voltages</b> | <b>Energy density<br/>/ Wh kg<sup>-1</sup></b> | <b>Power density<br/>/ kW kg<sup>-1</sup></b> | <b>Cycling retention<br/>%</b>                                                                                                   |
|-----------------|------------------------------------------------|-----------------------------------------------|----------------------------------------------------------------------------------------------------------------------------------|
| 0-4.0 V         | 153.26-12.09                                   | 0.58-10.88                                    | 90%/1000/10 A g <sup>-1</sup><br>84%/2000/10 A g <sup>-1</sup><br>84%/3000/10 A g <sup>-1</sup><br>84%/4000/10 A g <sup>-1</sup> |
| 0-4.3 V         | 159.25-27.02                                   | 0.59-12.16                                    | 84%/1000/10 A g <sup>-1</sup><br>84%/2000/10 A g <sup>-1</sup><br>79%/3000/10 A g <sup>-1</sup><br>76%/4000/10 A g <sup>-1</sup> |
| 0-4.5 V         | 168.39-41.07                                   | 0.59-13.44                                    | 83%/1000/10 A g <sup>-1</sup><br>78%/2000/10 A g <sup>-1</sup><br>78%/3000/10 A g <sup>-1</sup><br>70%/4000/10 A g <sup>-1</sup> |
| 0-4.7 V         | 184.77-48.53                                   | 0.58-13.44                                    | 73%/1000/10 A g <sup>-1</sup><br>65%/2000/10 A g <sup>-1</sup><br>60%/3000/10 A g <sup>-1</sup><br>54%/4000/10 A g <sup>-1</sup> |

**Table S7** A comparison for the performance of the KNCMF-111 (8<sup>#</sup>-P)//AC+LFP LICBs in the study with some reported LICs and LIBs.

|              | System                                         | Working voltage<br>/ V | Energy density<br>/ Wh kg <sup>-1</sup> | Power density<br>/ kW kg <sup>-1</sup> | Cycling retention<br>%          | Refs |
|--------------|------------------------------------------------|------------------------|-----------------------------------------|----------------------------------------|---------------------------------|------|
| <b>LICs</b>  | 3S-Nb <sub>2</sub> O <sub>5</sub> -HoMSs//AC   | 1-3.5                  | 93.8-19.6                               | 0.1125-22.5                            | 89%/10000/1 A g <sup>-1</sup>   | [1]  |
|              | Soft Carbon//AC/Li <sub>3</sub> N              | 2-4                    | 74.7(Max.)                              | 12.9(Max.)                             | 91%/10000/0.5 A g <sup>-1</sup> | [2]  |
|              | N-NbOC//AC                                     | 0-3                    | 86.6-58.7                               | 0.112-3.84                             | 81%/3500/3 A g <sup>-1</sup>    | [3]  |
|              | M-Nb <sub>2</sub> O <sub>5</sub> @C/rGO//AC    | 0.7-3.2                | 69.2-4.04                               | 0.248-9.17                             | 94%/2500/0.2 A g <sup>-1</sup>  | [4]  |
|              | cNiCo <sub>2</sub> O <sub>4</sub> //VACNFs     | 1-4.2                  | 136.9                                   | 0.2                                    | 90%/9000/4 A g <sup>-1</sup>    | [5]  |
|              | Co <sub>3</sub> (HHTP) <sub>2</sub> //ACS      | 0-4                    | 150-64                                  | 0.2-10                                 | 65%/1000/1 A g <sup>-1</sup>    | [6]  |
| <b>LIBs</b>  | Graphite//LiCrTiO <sub>4</sub>                 | 0.8-2.5                | 103                                     | /                                      | 63%/200/0.25 A g <sup>-1</sup>  | [7]  |
|              | Ni/NiO/NC//LiCoO <sub>2</sub>                  | 2.8-4.2                | /                                       | /                                      | 90%/100/0.2 C                   | [8]  |
|              | PyPF//LiFePO <sub>4</sub>                      | 2.5-4                  | 141                                     | /                                      | 78%/100/0.05 A g <sup>-1</sup>  | [9]  |
|              | m-Si HC/graphite//LiCoO <sub>2</sub>           | 2.5-4.2                | /                                       | /                                      | 73%/100/0.05 C                  | [10] |
|              | MnO@C-rGO//LiFePO <sub>4</sub> /Al             | 0-3.5                  | /                                       | /                                      | 90%/100/0.5 A cm <sup>-2</sup>  | [11] |
| <b>LICBs</b> | <b>KNCMF-111(8<sup>#</sup>-P)<br/>//AC+LFP</b> | 0-4.0                  | 153.26-12.09                            | 0.58-10.88                             | 84%/3000/10 A g <sup>-1</sup>   |      |
|              |                                                |                        |                                         |                                        | 84%/4000/10 A g <sup>-1</sup>   |      |
|              |                                                | 0-4.3                  | 159.25-27.02                            | 0.59-12.16                             | 79%/3000/10 A g <sup>-1</sup>   |      |
|              |                                                |                        |                                         |                                        | 76%/4000/10 A g <sup>-1</sup>   |      |
|              |                                                | 0-4.5                  | 168.39-41.07                            | 0.59-13.44                             | 78%/3000/10 A g <sup>-1</sup>   |      |
|              |                                                |                        |                                         |                                        | 70%/4000/10 A g <sup>-1</sup>   |      |
|              |                                                | 0-4.7                  | 184.77-48.53                            | 0.58-13.44                             | 60%/3000/10 A g <sup>-1</sup>   |      |

## References

- [1] R. Bi, N. Xu, H. Ren, N. Yang, Y. Sun, A. Cao, R. Yu, D. Wang, A Hollow Multi-Shelled Structure for Charge Transport and Active Sites in Lithium-Ion Capacitors, *Angew. Chem. Int. Ed.* 59 (2020) 4865-4868.
- [2] C. Sun, X. Zhang, C. Li, K. Wang, X. Sun, Y. Ma, High-efficiency sacrificial prelithiation of lithium-ion capacitors with superior energy-storage performance, *Energy Storage Mater.* 24 (2020) 160-166.
- [3] S. Hemmati, G. Li, X. Wang, Y. Ding, Y. Pei, A. Yu, Z. Chen, 3D N-doped hybrid architectures assembled from 0D T-Nb<sub>2</sub>O<sub>5</sub> embedded in carbon microtubes toward high-rate Li-ion capacitors, *Nano Energy* 56 (2019) 118-126.
- [4] X. Jiao, Q. Hao, X. Xia, Z. Wu, W. Lei, Metal organic framework derived Nb<sub>2</sub>O<sub>5</sub>@C nanoparticles grown on reduced graphene oxide for high-energy lithium ion capacitors, *Chem. Commun.* 55 (2019) 2692-2695.
- [5] C.-F. Cheng, X. Li, K. Liu, F. Zou, W.-Y. Tung, Y.-F. Huang, X. Xia, C.-L. Wang, B.D. Vogt, Y. Zhu, A high-performance lithium-ion capacitor with carbonized NiCo<sub>2</sub>O<sub>4</sub> anode and vertically-aligned carbon nanoflakes cathode, *Energy Storage Mater.* 22 (2019) 265-274.
- [6] J. Sun, L. Guo, X. Sun, J. Zhang, Y. Liu, L. Hou, C. Yuan, Conductive Co-based metal–organic framework nanowires: a competitive high-rate anode towards advanced Li-ion capacitors, *J. Mater. Chem. A* 7 (2019) 24788-24791.
- [7] K. Subramanyan, S. Natarajan, Y.-S. Lee, V. Aravindan, Exploring the usage of LiCrTiO<sub>4</sub> as cathode towards constructing 1.4 V class Li-ion cells with graphite anode recovered from spent Li-Ion battery, *Chem. Eng. J.* 397 (2020) 125472.
- [8] S. Archana, M. Athika, P. Elumalai, Supercapattery and full-cell lithium-ion battery performances of a [Ni(Schiff base)]-derived Ni/NiO/nitrogen-doped carbon heterostructure, *New J. Chem.* 44 (2020) 12452-12464.
- [9] S. Mamidi, A. Gangadharan, C.S. Sharma, Graphite coated pyrolyzed filter paper as a low-cost binder-free and freestanding anode for practical lithium-ion battery application, *Electrochim. Acta* 310 (2019) 222-229.
- [10] T. Yoon, T. Bok, C. Kim, Y. Na, S. Park, K.S. Kim, Mesoporous Silicon Hollow Nanocubes Derived from Metal–Organic Framework Template for Advanced Lithium-Ion Battery Anode, *ACS Nano* 11 (2017) 4808-4815.
- [11] G. Zhong, J. Yu, P. Zhuang, M. Jin, Y. Fu, X. Ma, Ultralong MnO@C nanowires with internal voids anchored between graphene as a robust high performance anode for flexible Li-Ion battery, *Electrochim. Acta* 296 (2019) 276-282.
